# Supplementary material
Source: ML conference proceedings conference paper supplement (https://openaccess.thecvf.com/content/cvpr_2015/html/Rozantsev_Flying_Objects_Detection_2015_CVPR_paper.html)
Supplement: Supplementary file 1 [file supp_plots.pdf › UAV_detection_material/data/supp_plots.pdf]

**Flying Objects Detection from a Single Moving Camera**  
**Supplementary material**

Anonymous CVPR submission

Paper ID 2000

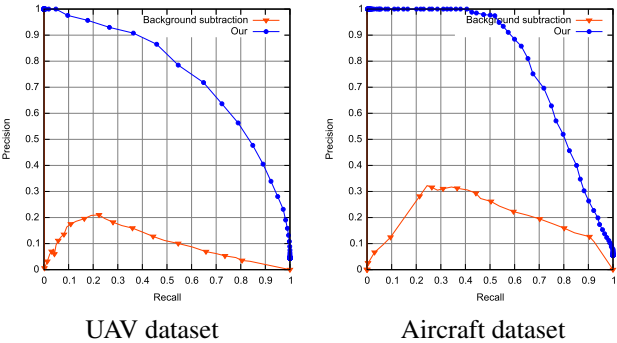

Figure 1: Background subtraction algorithm is not able to achieve reasonable performance in this video sequences, because of the fast motion of the camera and noisy background.

**1. Comparison to background subtraction method**

As discussed in the Section 4.3 of the main submission, we present here the precision-recall curves for comparison of our method to the MultiCue background subtraction algorithm. Fig. 1 depicts this evaluation for both UAV and Aircraft datasets. We can see that it is hard to achieve high performance using just motion information, due to the sharp motion of the camera and noisy background.
